# Supplementary material for: MicroRNA-5010-5p ameliorates high-glucose induced inflammation in renal tubular epithelial cells by modulating the expression of PPP2R2D
Source: PubMed Central journal article supplement — BMJ Open Diabetes Res Care. 2024 Mar 4;12(2):e003784. doi: 10.1136/bmjdrc-2023-003784 (PMC11146382; doi:10.1136/bmjdrc-2023-003784), 2024-03-04
Supplement: bmjdrc-2023-003784supp001.pdf [file bmjdrc-2023-003784supp001.pdf]

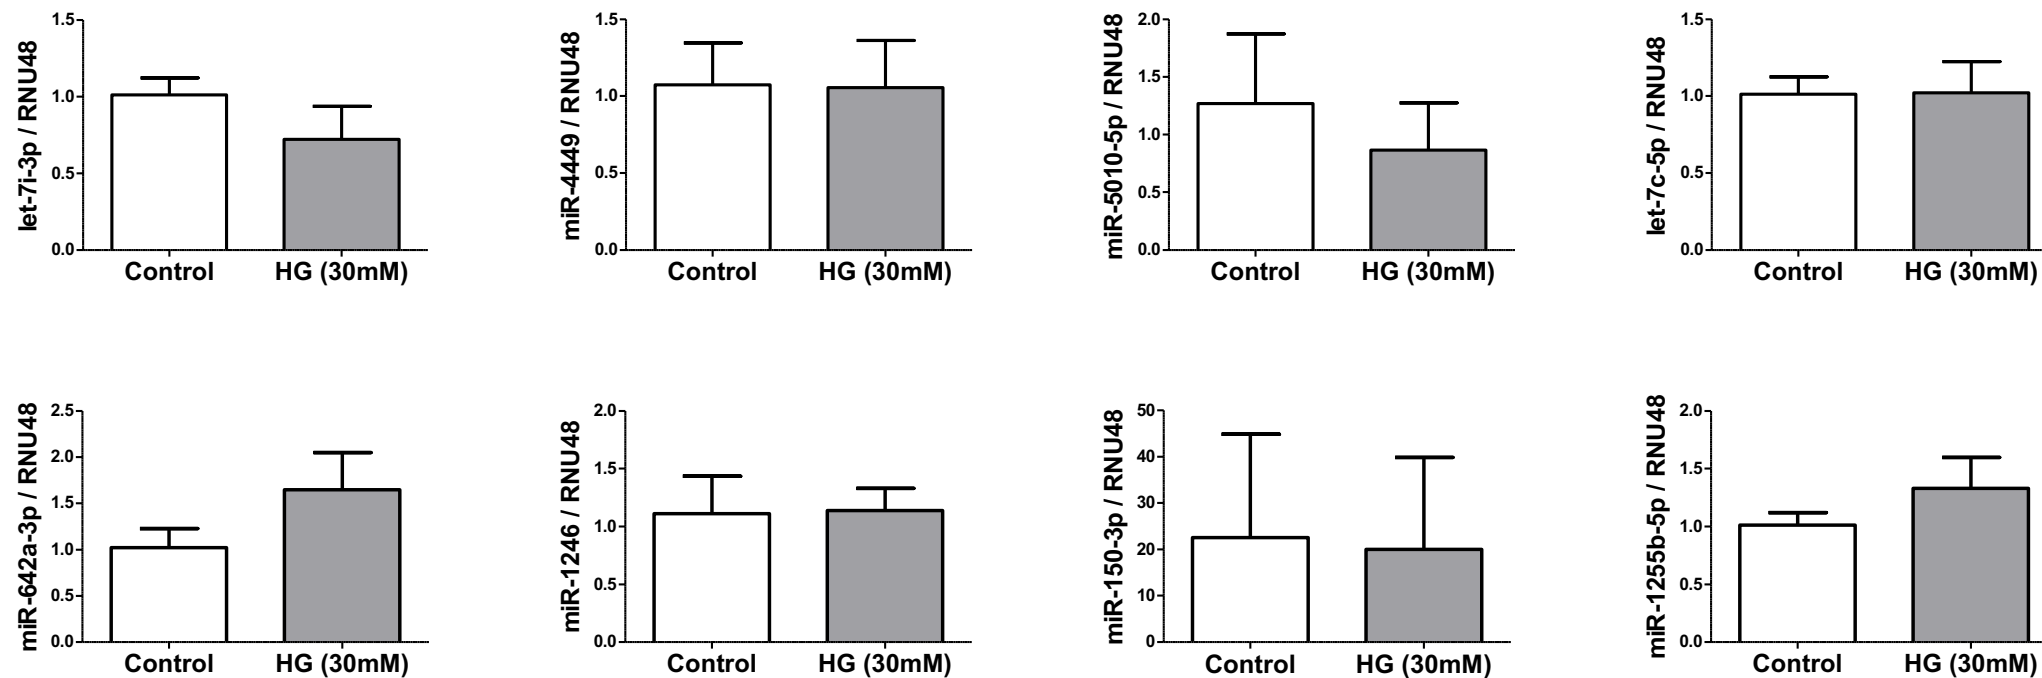

**Fig. S1. High glucose stimulation does not change the intracellular levels of miRNAs in HK-2 cells. RT-P**

CR analysis of cellular miRNA expression levels. HK-2 cells were treated with 30 mM D-glucose.
